# Supplementary material for: Thiazolidine-2,4-dione hybrids as dual alpha-amylase and alpha-glucosidase inhibitors: design, synthesis, in vitro and in vivo anti-diabetic evaluation
Source: Royal Society of Chemistry journal article supplement (doi:10.1039/d4md00199k), 2024-01-01
Supplement: d4md00199k2.pdf [file d4md00199k2.pdf]

Table S1: Docking score of synthesized compounds within the active site of Human Pancreatic Alpha-glucosidase and Alpha-amylase.

| Docking Score |                                        |                              |
|---------------|----------------------------------------|------------------------------|
| Compound      | Alpha Glucosidase (Uniprot id: P00689) | Alpha-Amylase (PDB id: 1B2Y) |
| 9a            | -6.227                                 | -5.365                       |
| 9b            | -7.300                                 | -2.713                       |
| 9c            | -6.224                                 | -3.247                       |
| 9d            | -7.432                                 | -1.202                       |
| 9e            | -7.253                                 | -4.687                       |
| 9f            | -6.235                                 | -2.942                       |
| 9g            | -6.757                                 | -3.096                       |
| 9h            | -6.590                                 | -5.467                       |
| 9i            | -7.236                                 | -4.543                       |
| 11a           | -4.373                                 | -3.792                       |
| 11b           | -6.576                                 | -4.372                       |
| 11c           | -5.710                                 | -4.216                       |
| Acarbose      | -11.690                                | -12.270                      |

Colour scheme

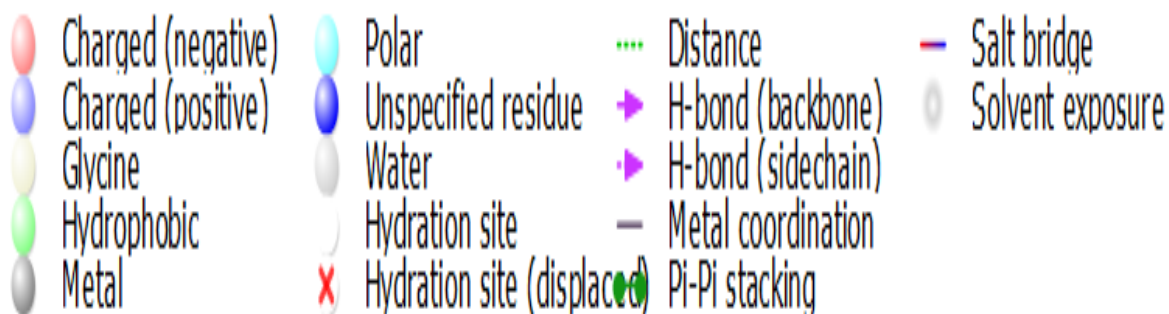

## A. 2D-poses of synthesized molecules within the active site of Human Pancreatic Alpha Glucosidase (Uniprot id: P00689)

9a

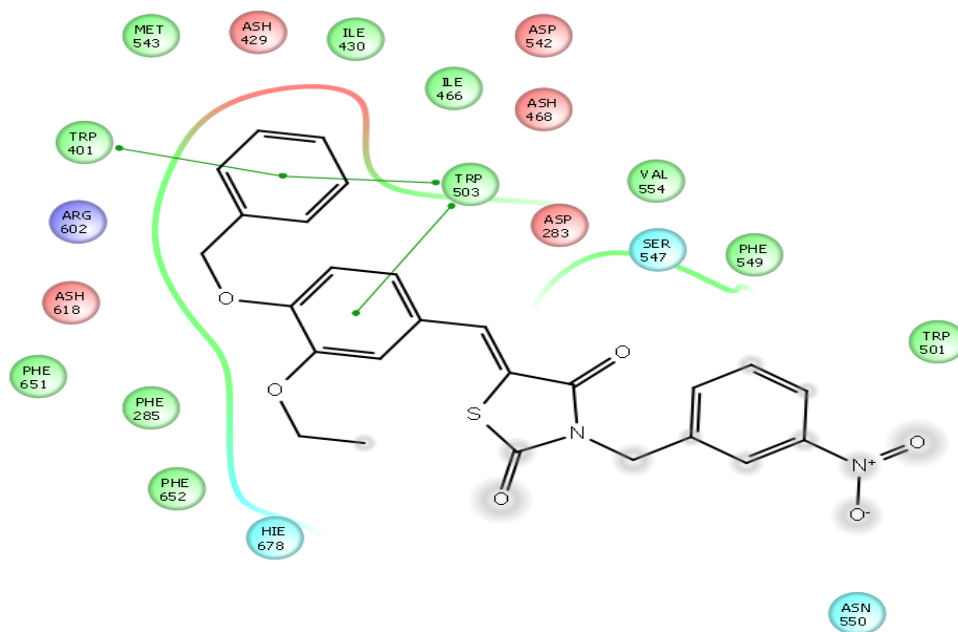

9b

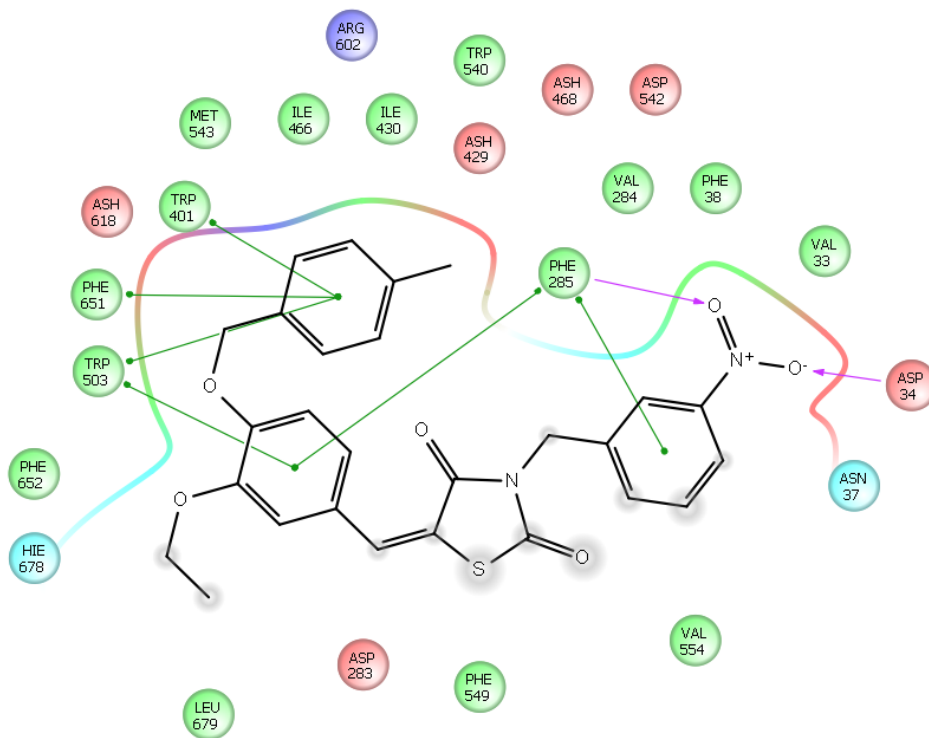

9c

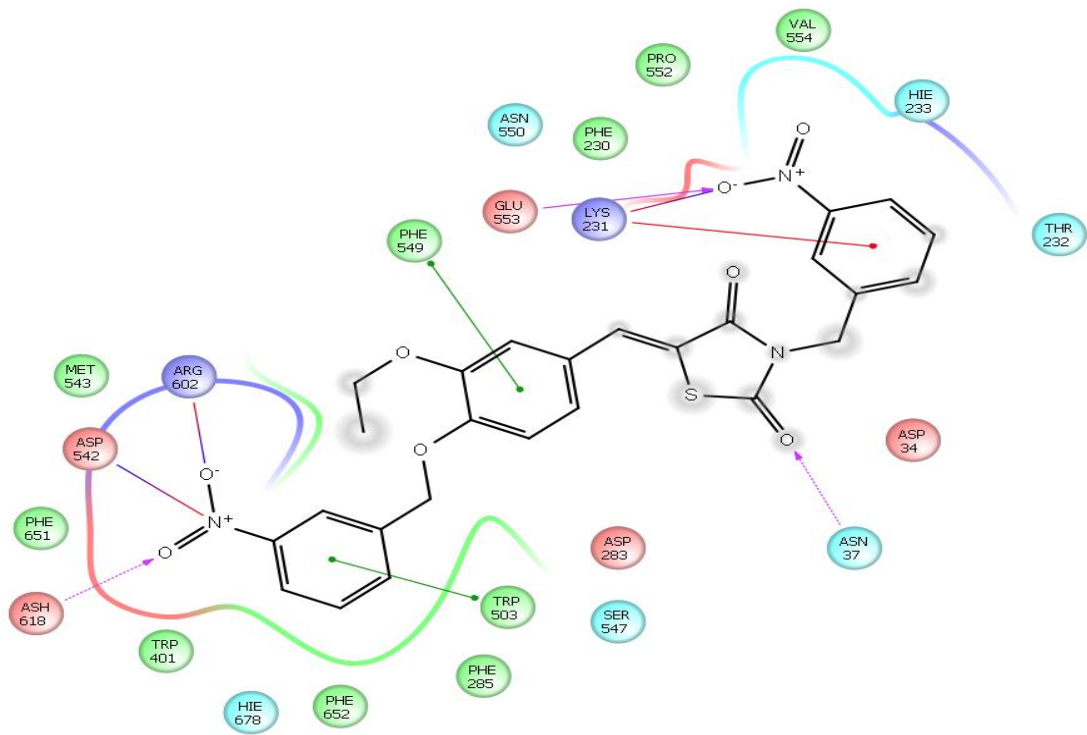

9d

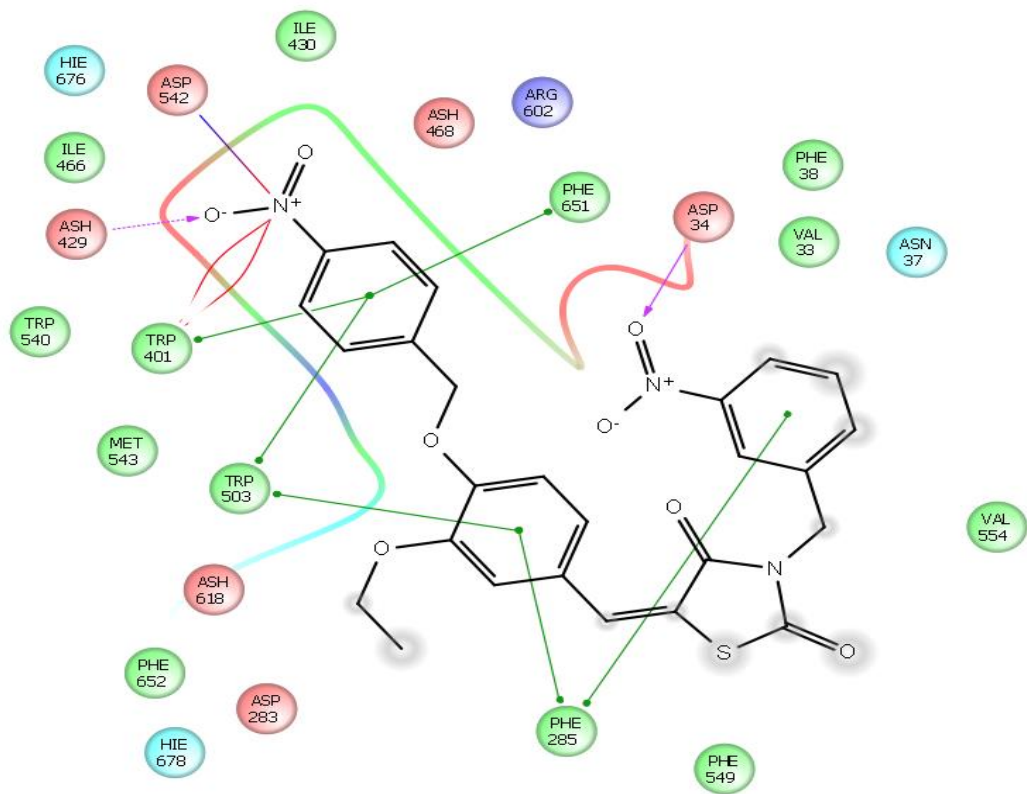

9e

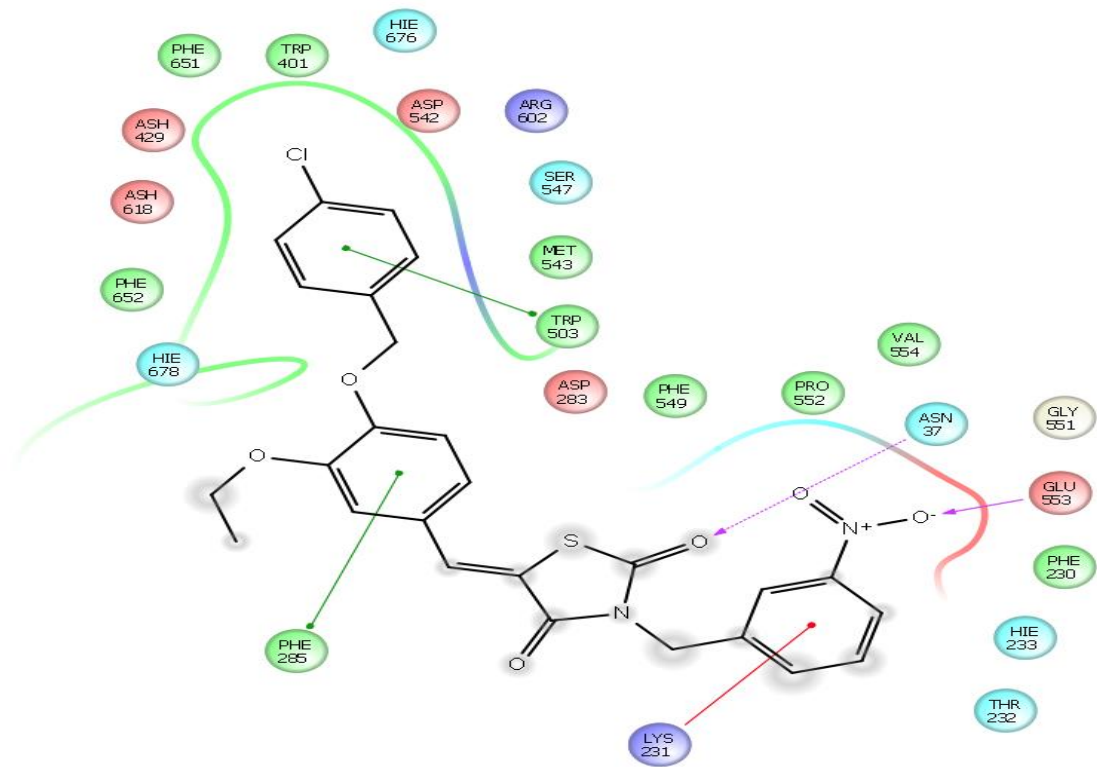

9h

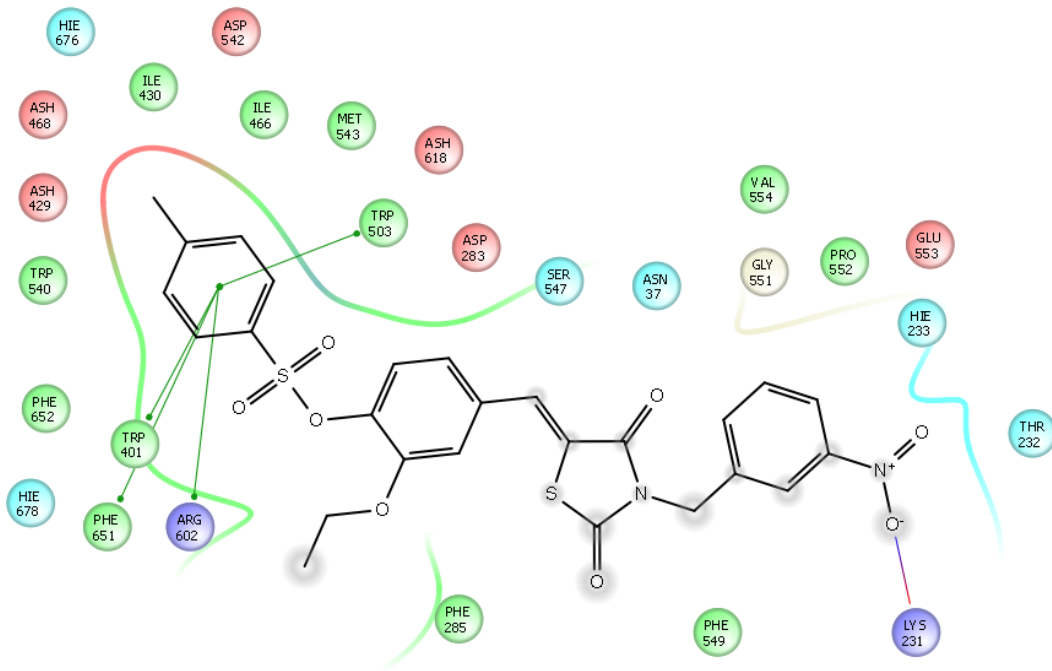

9i

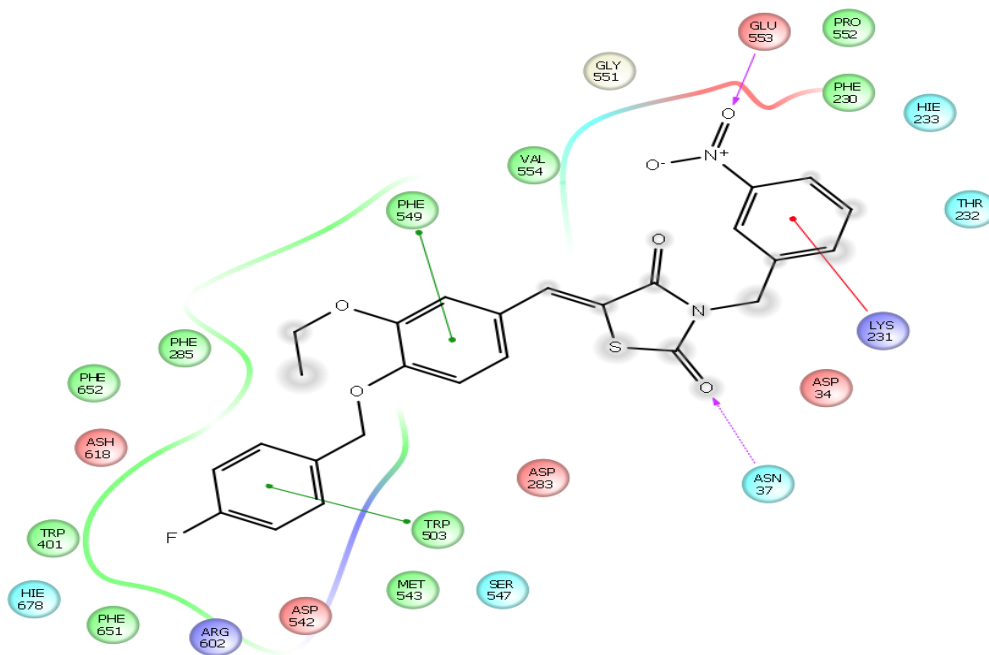

11a

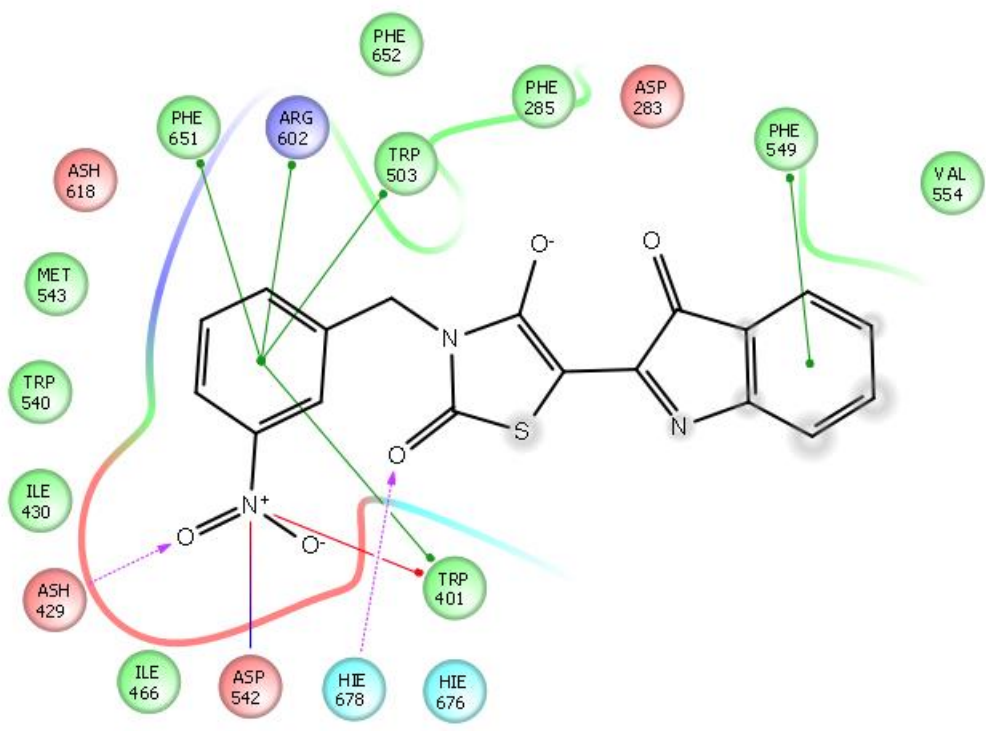

11b

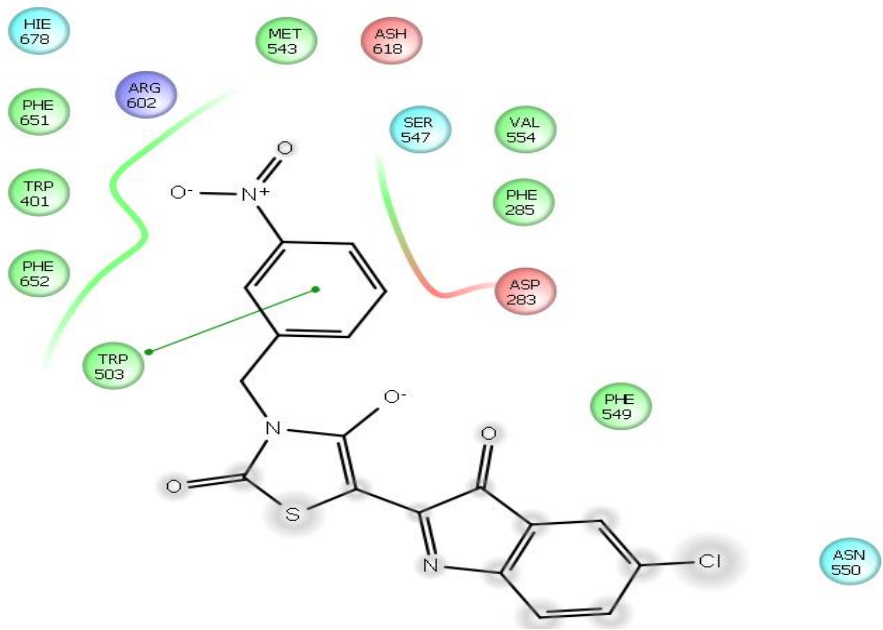

11c

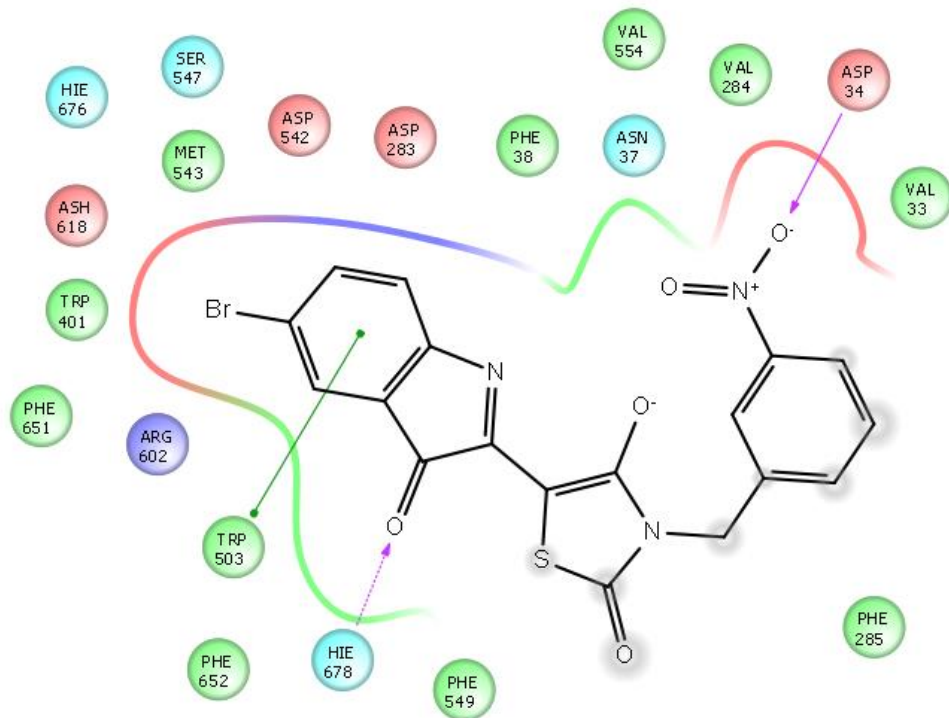

### Acarbose

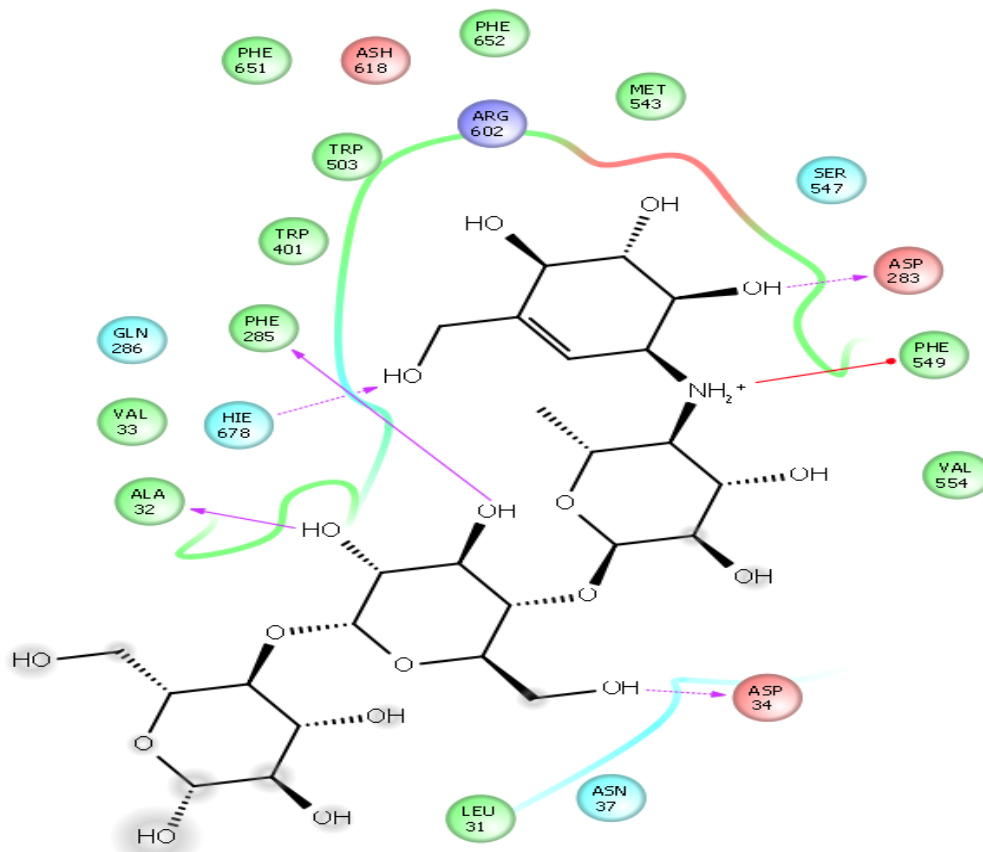

## b. Docking Against 3W37

Using the Schrodinger Maestro interface, all synthesized molecules were docked at the active site  $\alpha$ -glucosidase (PDB id:3W37). The ligands fit well within the protein's active site and display prominent binding interaction at the active site of the  $\alpha$ -glucosidase. The obtained 2-D poses are summarized below. 3-NO<sub>2</sub> (9a-c & 9e-i) attached to the phenyl ring at the 3-position of the TZD core exhibited salt bridge formation between the nitrogen atom and ASP357, ASP568, and ASP568. The 4-NO<sub>2</sub> group in compound 9d displayed similar interaction within the active site of the molecule.  $\pi$ -cation interaction between the N of NO<sub>2</sub> groups and TRP329 was also observed. Hydrogen bond formation between oxygen atoms of -OCH<sub>2</sub>Ph and Lys506 was observed in the 9A, 9F, and 9G. Another hydrogen bond between Arg552 and the TZD core's oxygen of C-2 (9A, 9C, 9I, 11A & 11C) and C-4 (9F) carbonyl groups was also observed. The SO<sub>2</sub> and 3-NO<sub>2</sub> groups also form H-bonds with Arg552 in compounds 9H and 11B, respectively.  $\pi$ - $\pi$  stacking interaction between PHE476 and the phenyl ring of vanillin and 3-NO<sub>2</sub> groups was also observed. Compound 9B exhibited four  $\pi$ - $\pi$  stacking interactions, i.e., PHE376 & 3-NO<sub>2</sub>Ph, TRP432 & 3-NO<sub>2</sub>Ph, Vanillin and TRP329 & 4-MePh. The compound 9E displayed the weakest interactions, which justified its poor *in vitro* activity against  $\alpha$ -glucosidase.

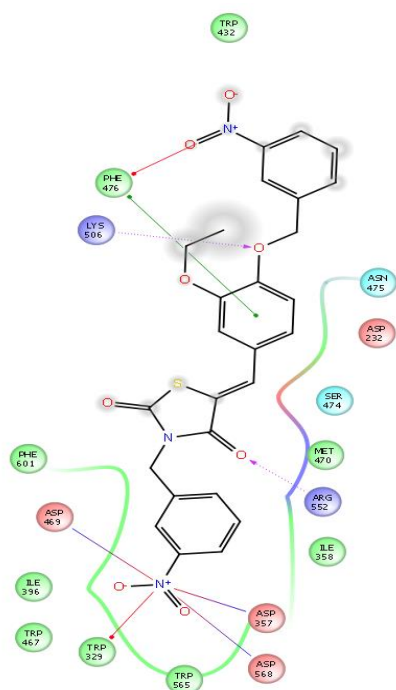

## B. 2-D pose of

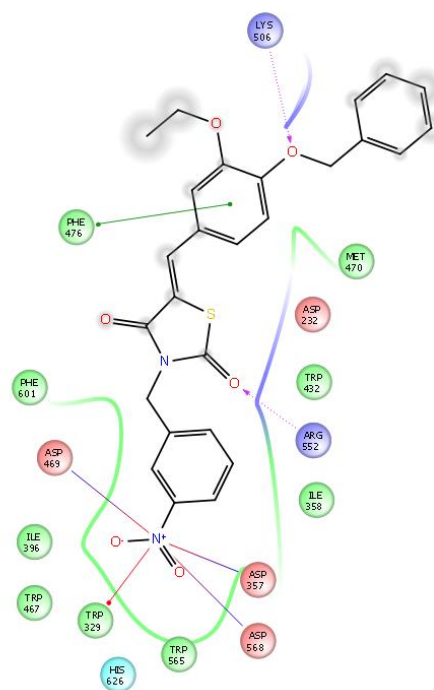



synthesized compounds against  $\alpha$ -Glucosidase (PDB id: 3W37)

9a

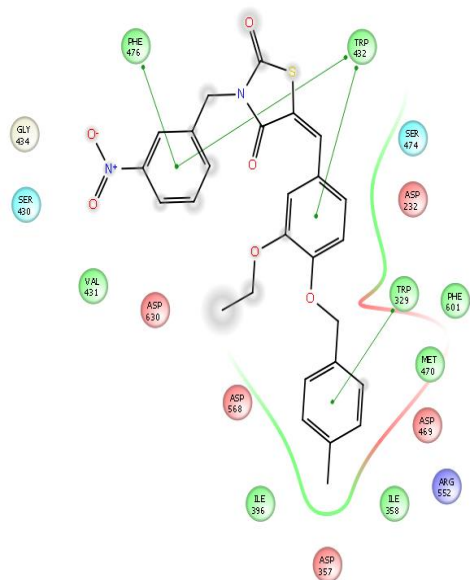

9b

9c

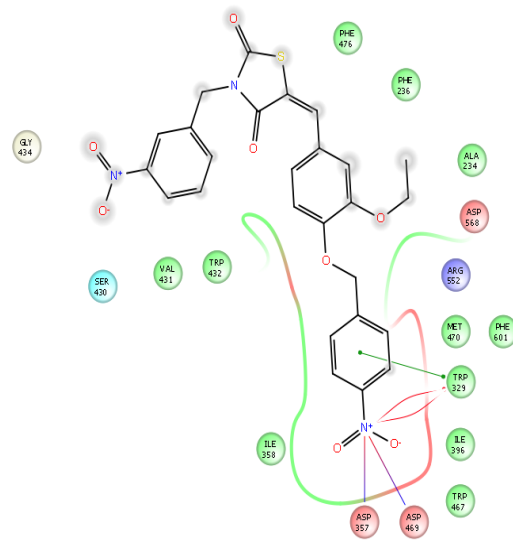

9d

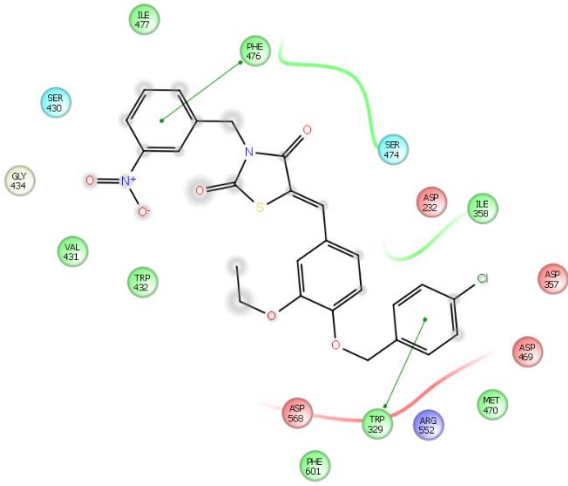

9e

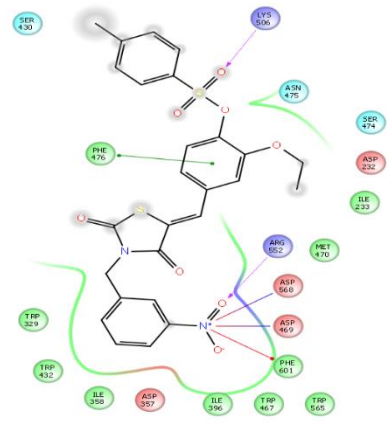

9h

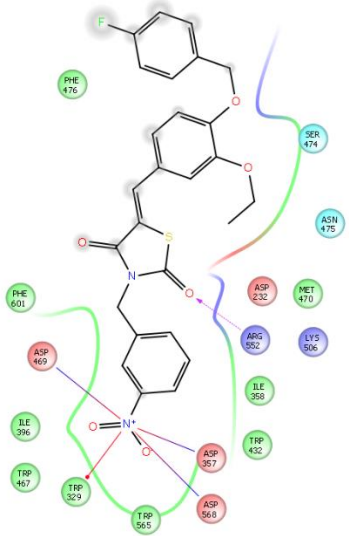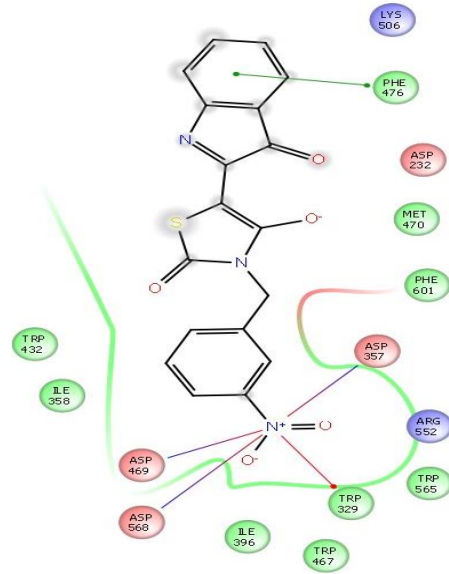

9i

11a

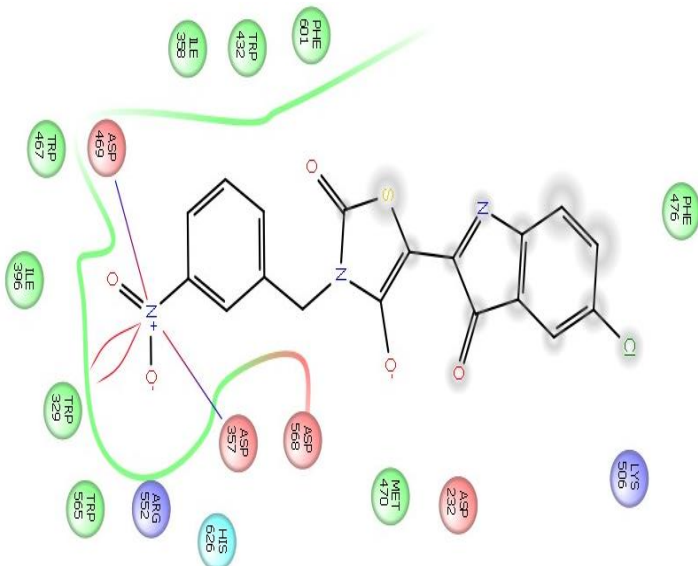

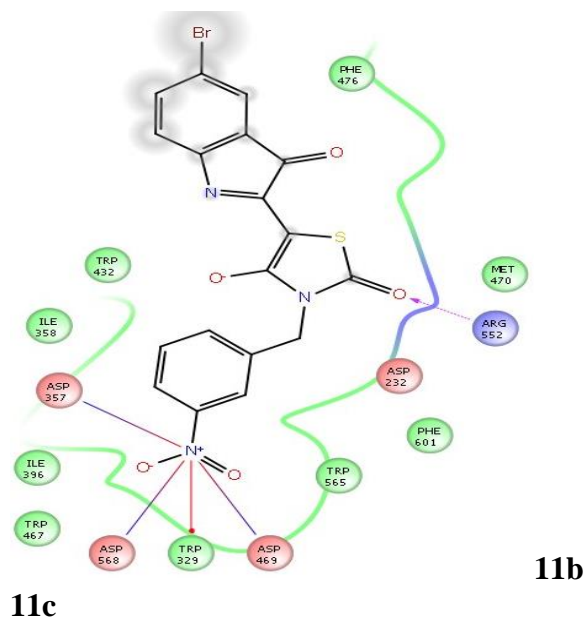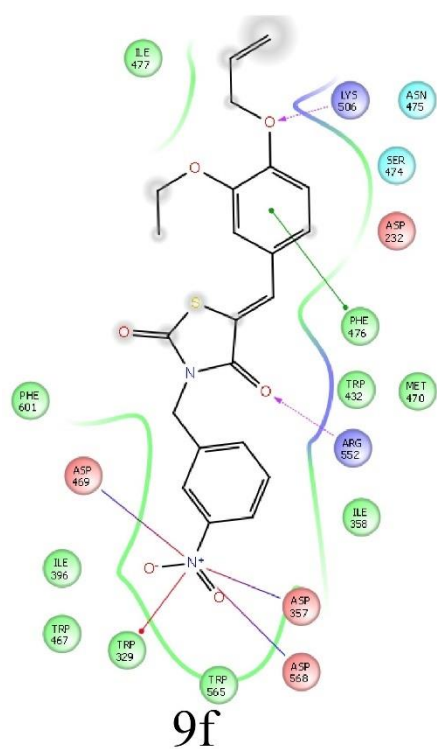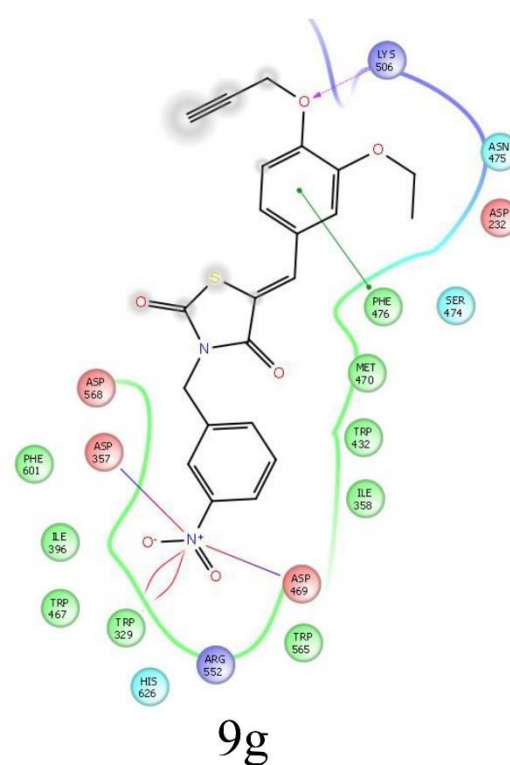

### C. MD simulation within the active site of alpha-glucosidase (PDB id: 3W37)

The molecule was simulated for 100 ns, and RMSD, RMSF, and radius of gyration were calculated. The results showed that the ligand and the protein formed a stable complex within the protein's active site after 40 sec, which remained stable for 100 ns. The RMSD

variation was in the range of 0.8 -1.8 Å for the 9G within the protein's active site. The radius of gyration was found in the range of 5.1-6.0 Å. Further, no intramolecular hydrogen bonding was observed. The RMSF value for the different atoms present in the ligand was in the range of 2-6 Å. Furthermore, various interactions within the active site of the protein, such as H-bonds with Ser430, Lys506, Asn569, Arg624, and Arg629, Hydrophobic interaction with Trp329, Trp432, Phe476, Phe601, and Ionic interaction with residues like Asp469, Lys506, and Asn568 were observed. Furthermore, water bridges were also seen, further enhancing ligand stability within the active site of 3W37.

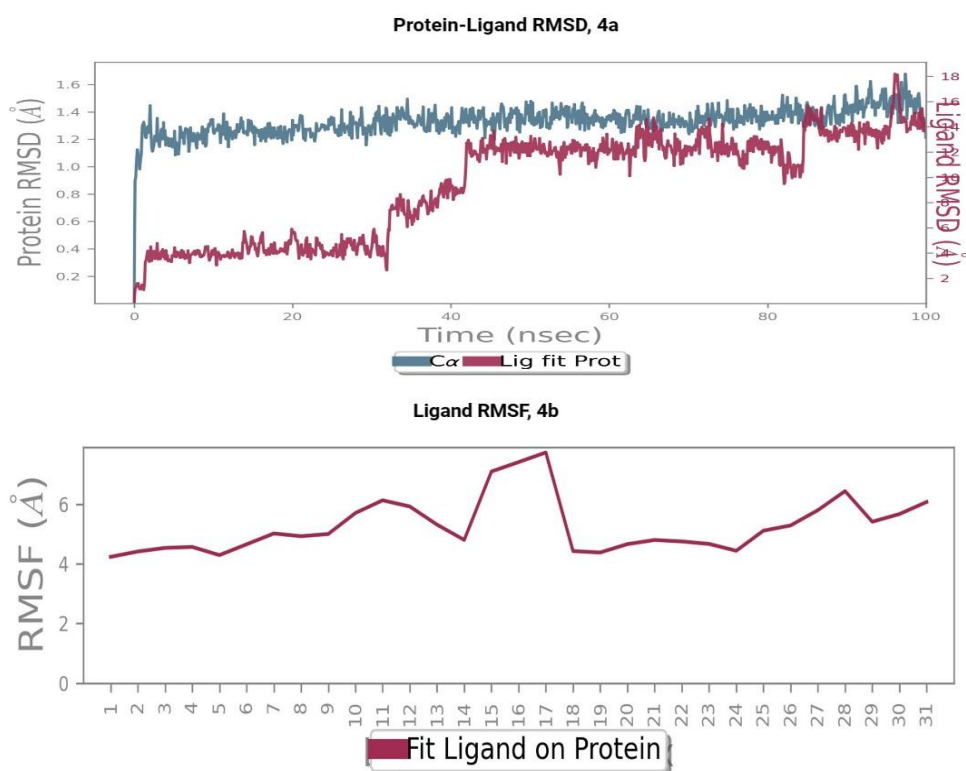

**Figure S1: Simulation of 9G within the active site of alpha-glucosidase (PDB id: 3W37).**

**D. 2-D pose of synthesized compounds against human pancreatic  $\alpha$ -amylase (PDB id: 1B2Y)**

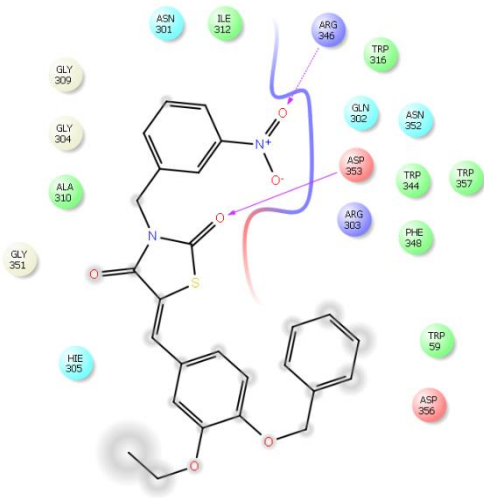

9a

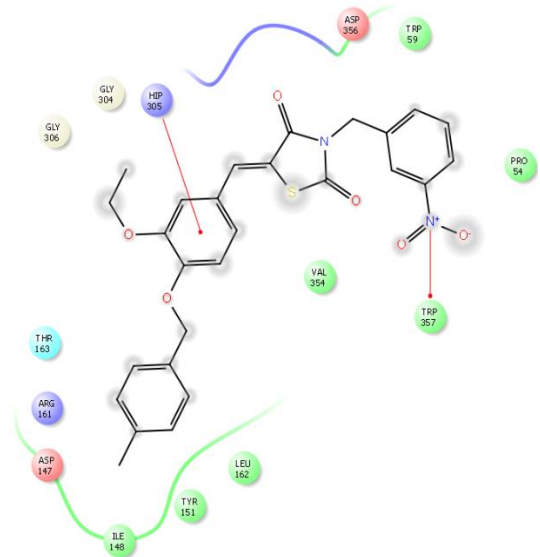

9b

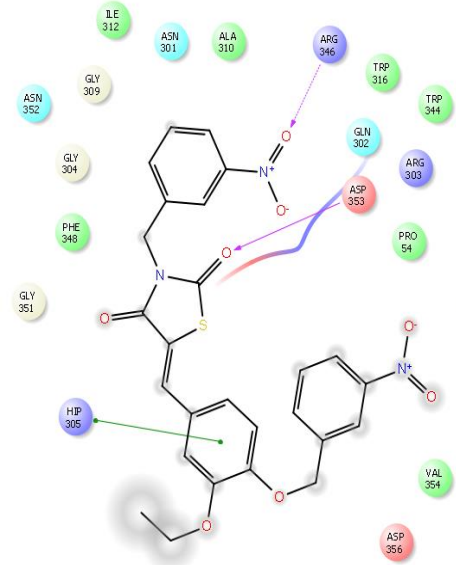

9c

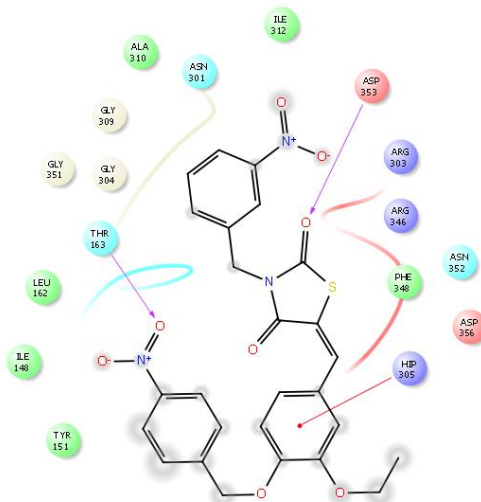

9d

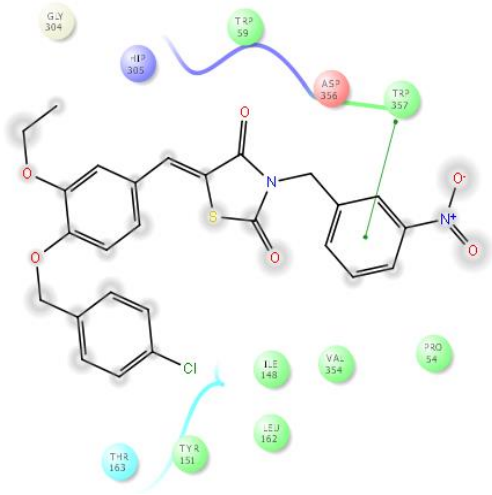

9e

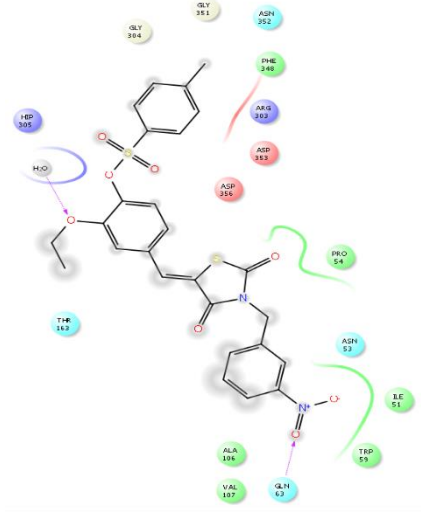

9h

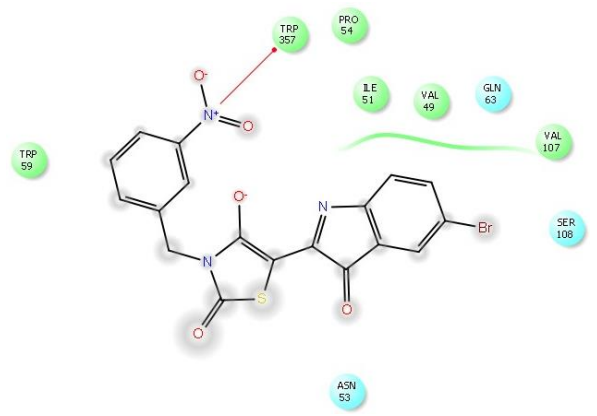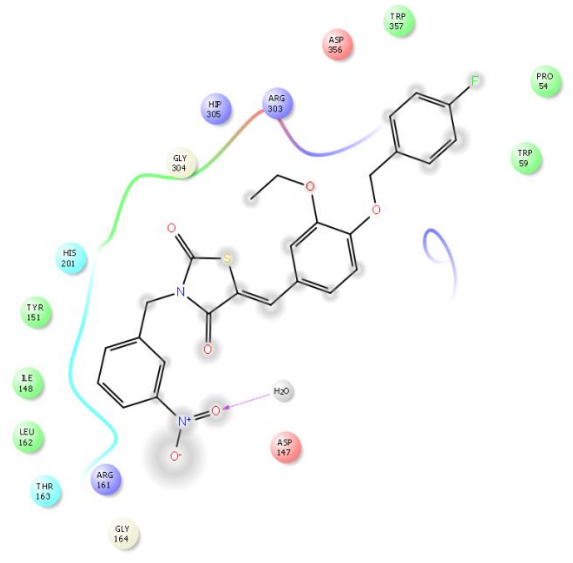



### E. Cytotoxicity Data (a. PANC-1)

9a

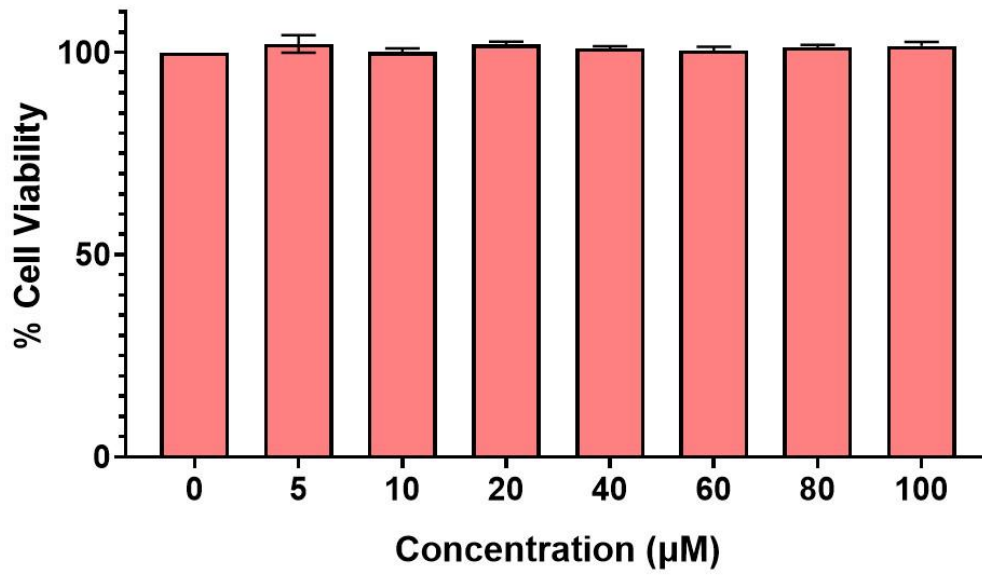

9b

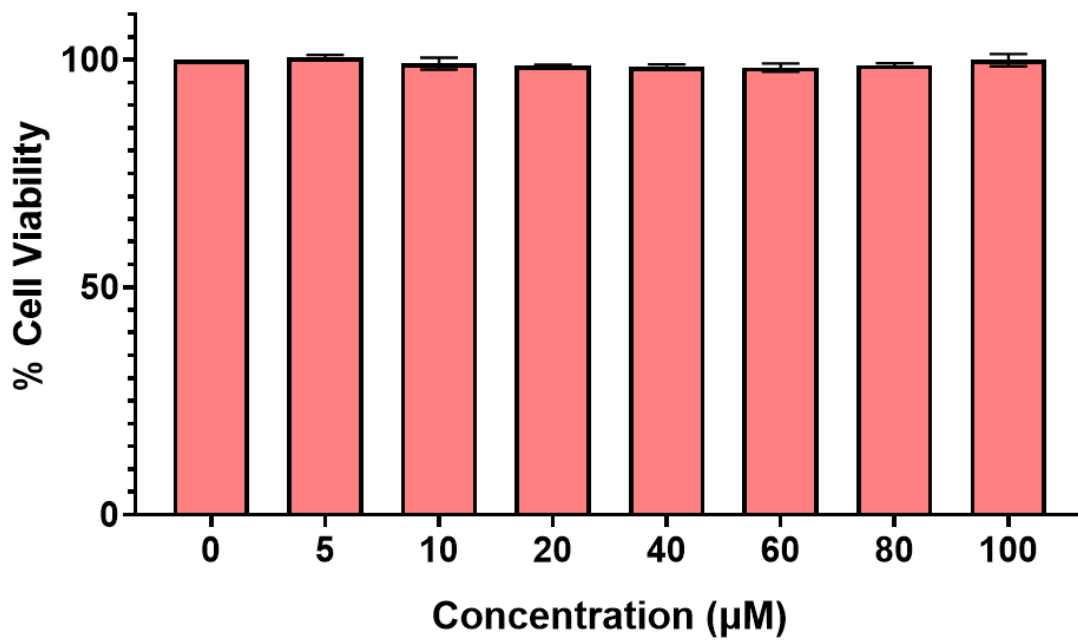



9c

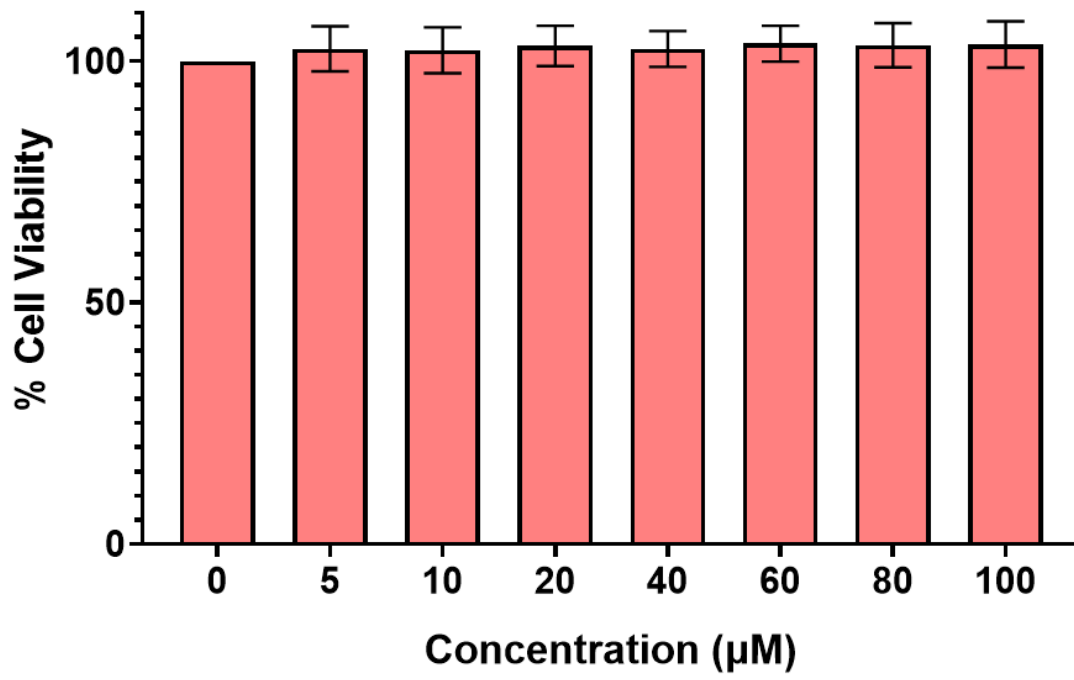

9d

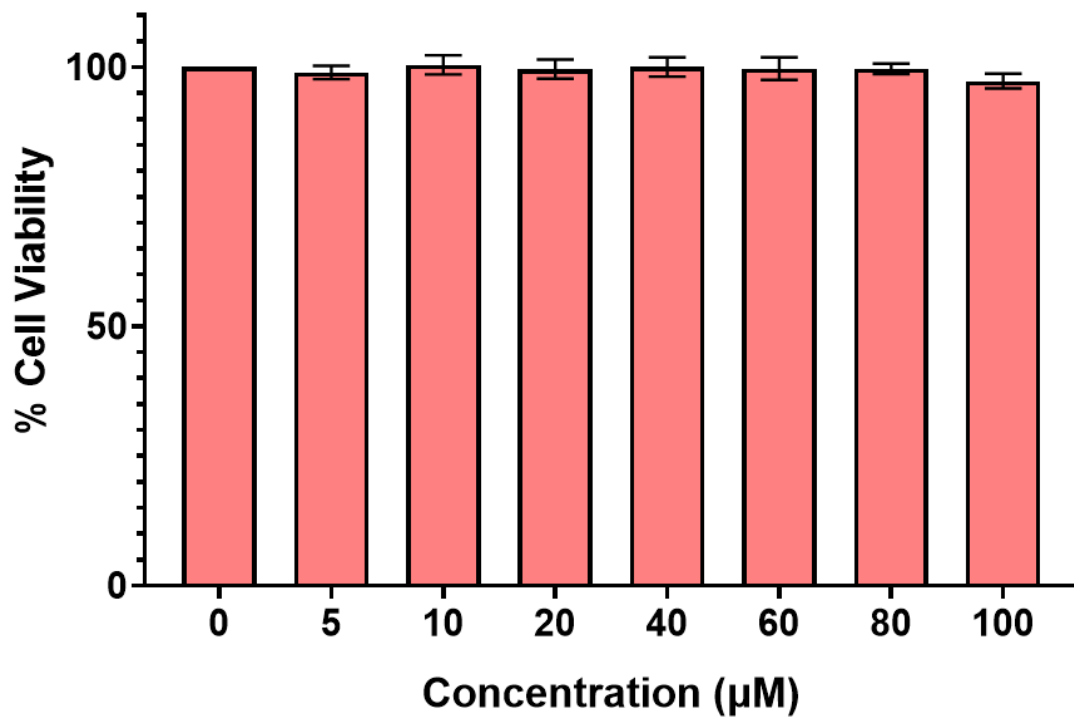

9e

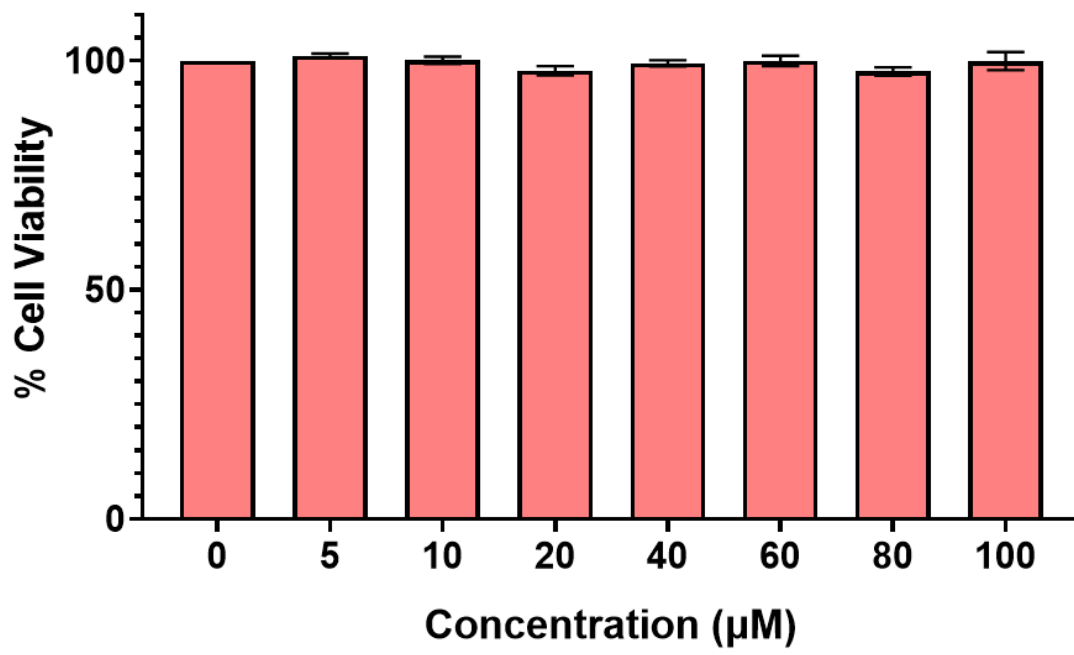

9h

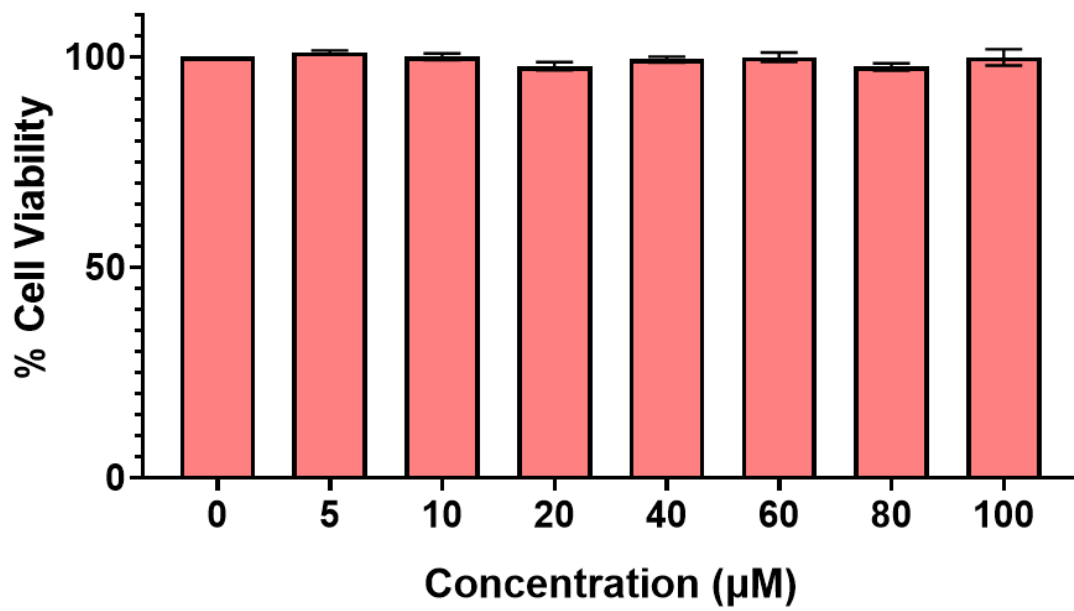

9i

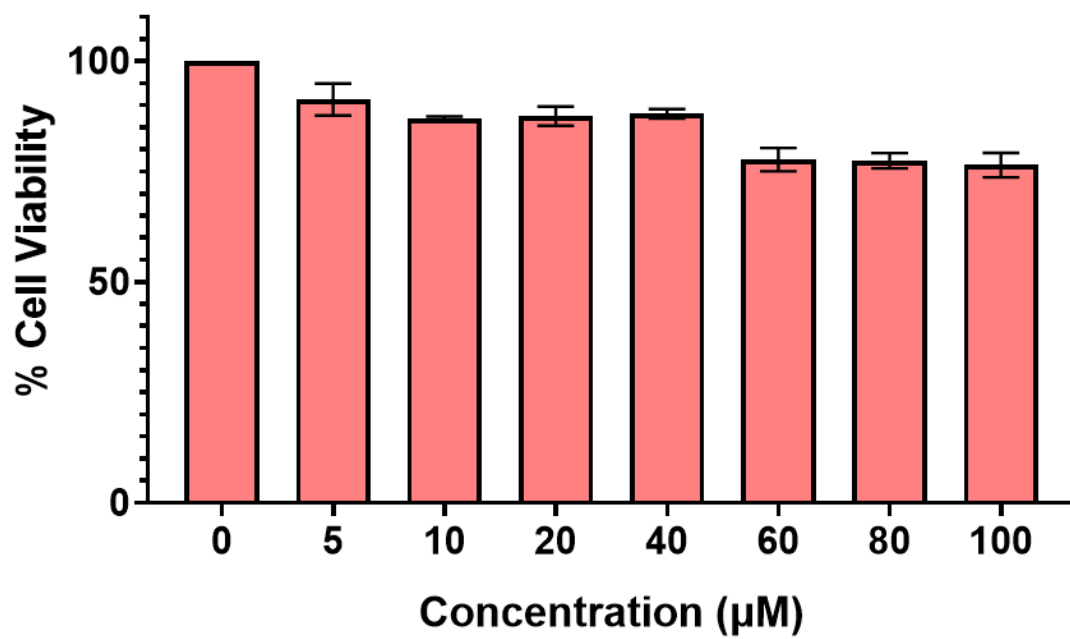

11a

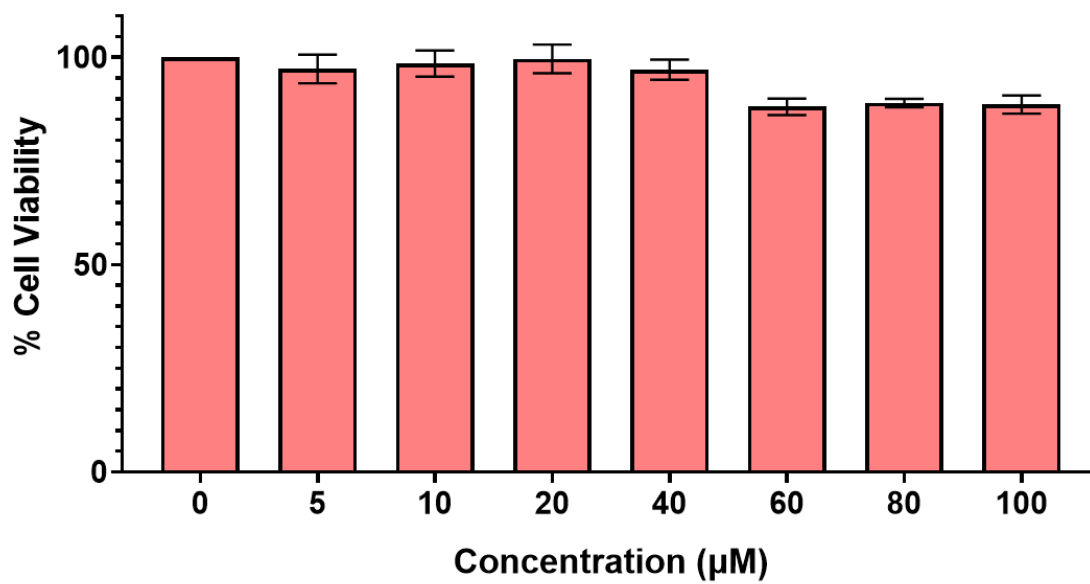

11b

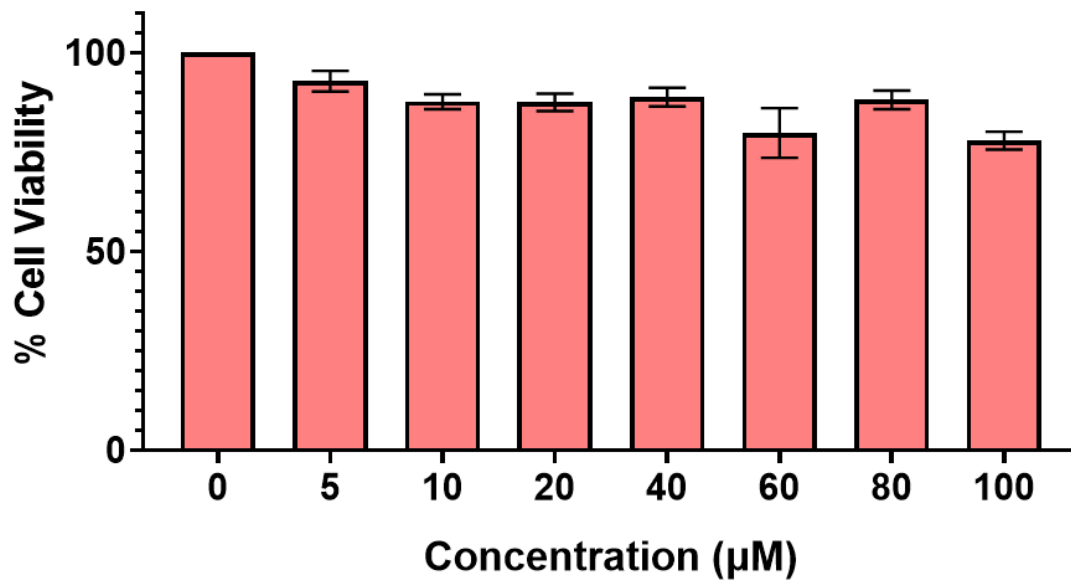

11c

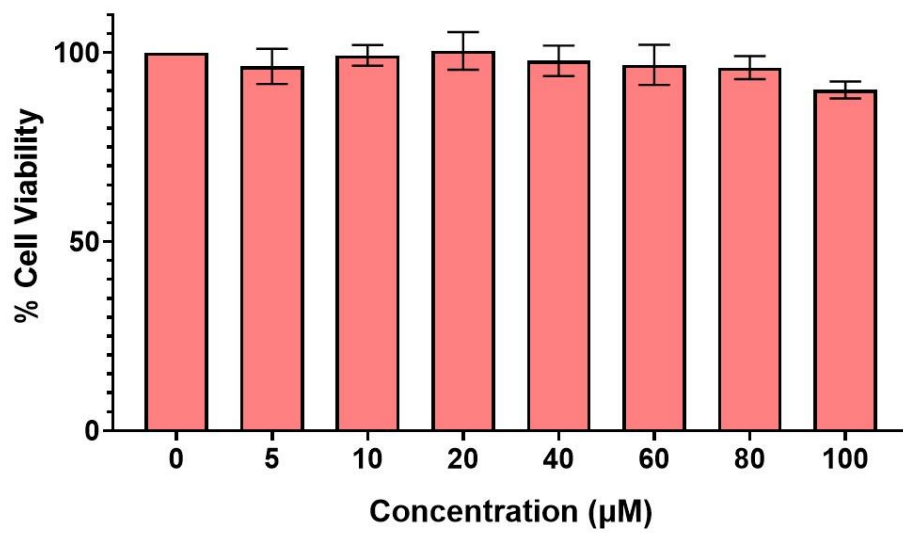

Acarbose

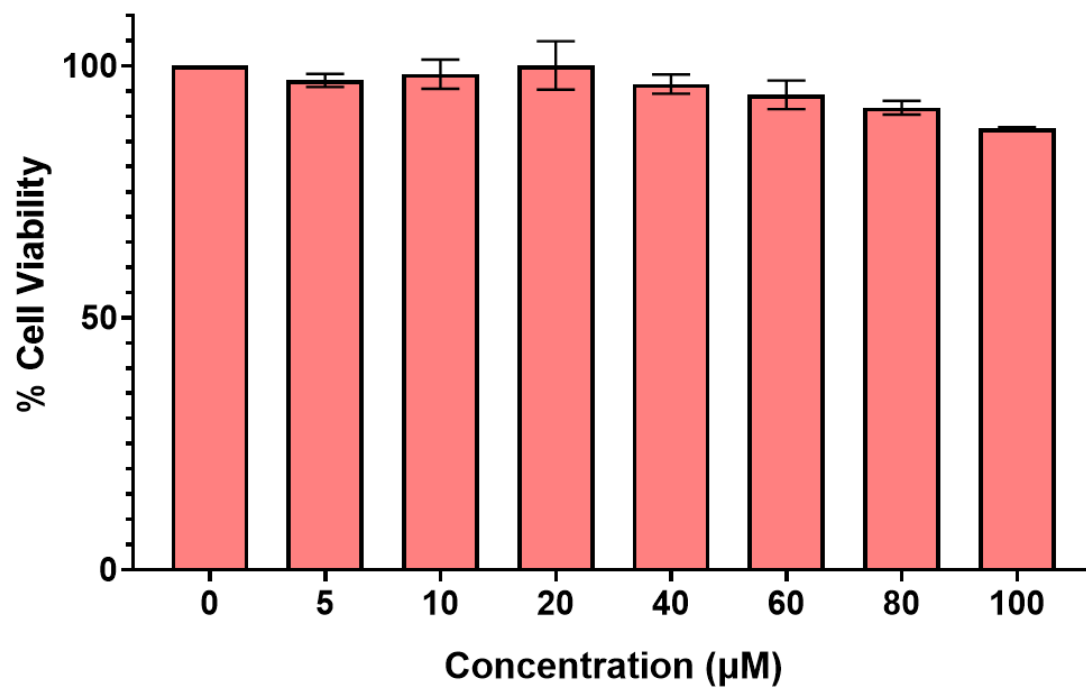

**F. Cytotoxicity data (INS1 cell line)**

### 9A

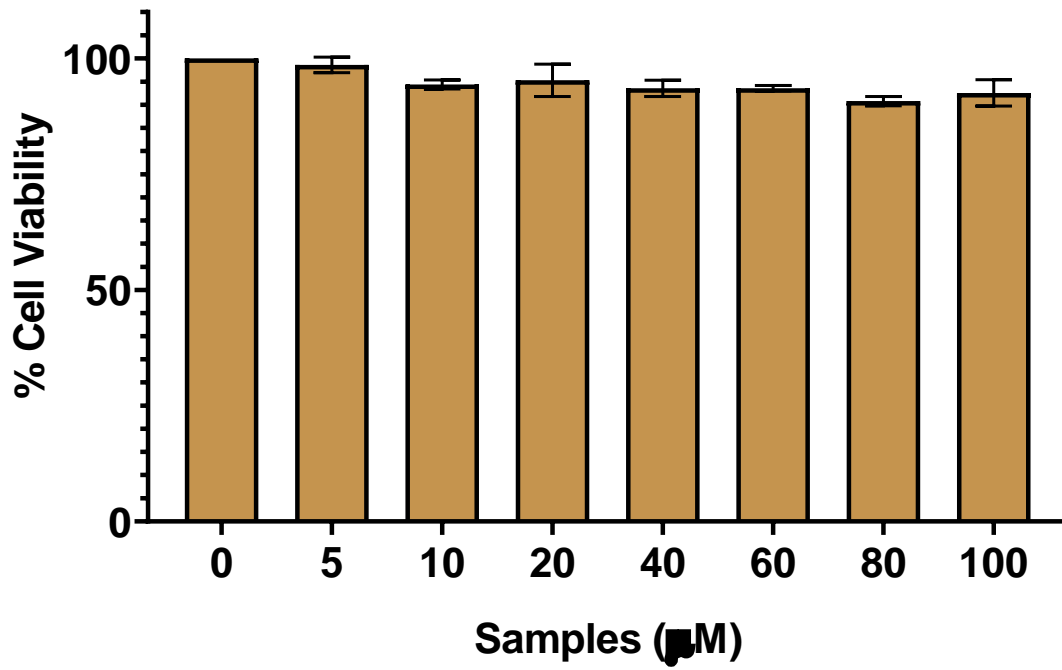

### 9B

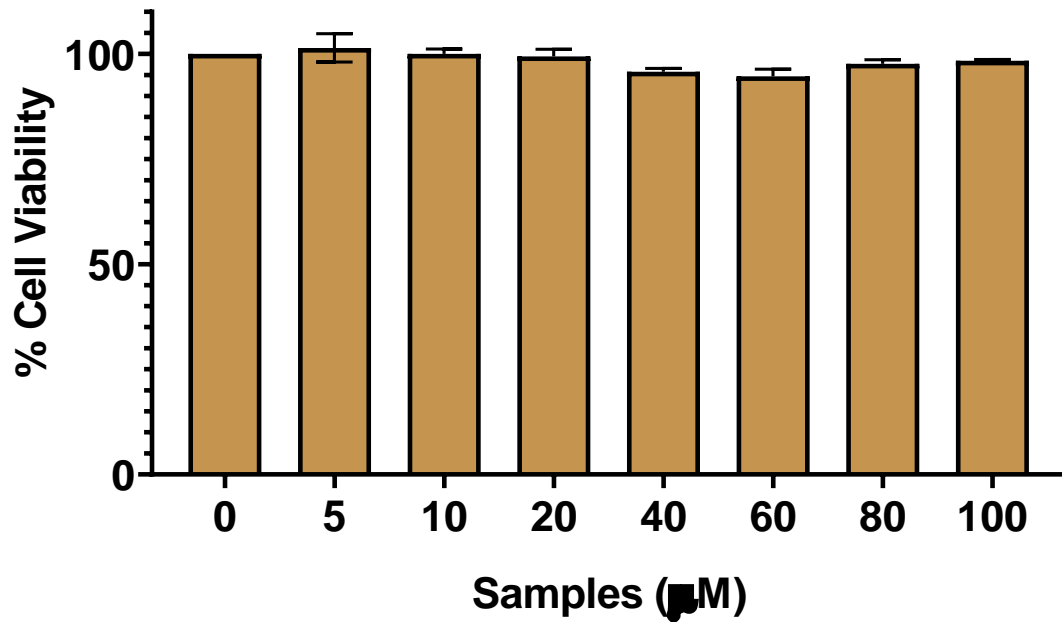

9C

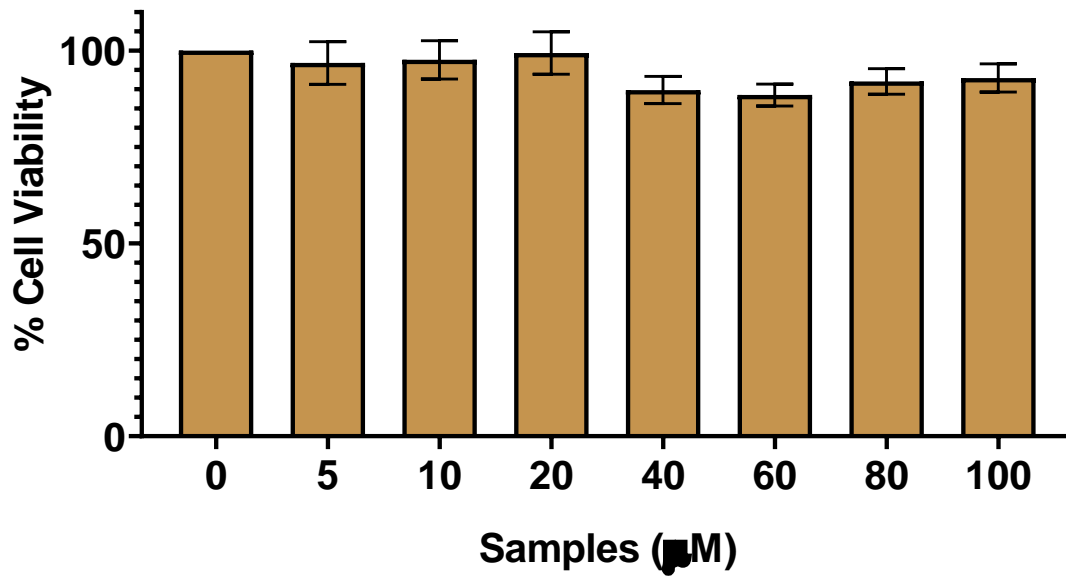

9D

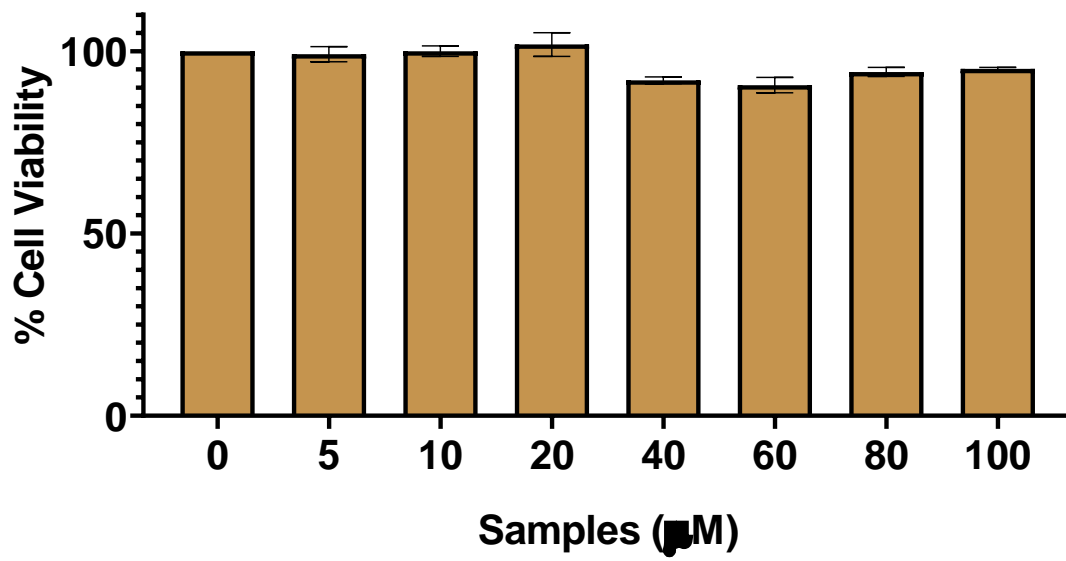

9E

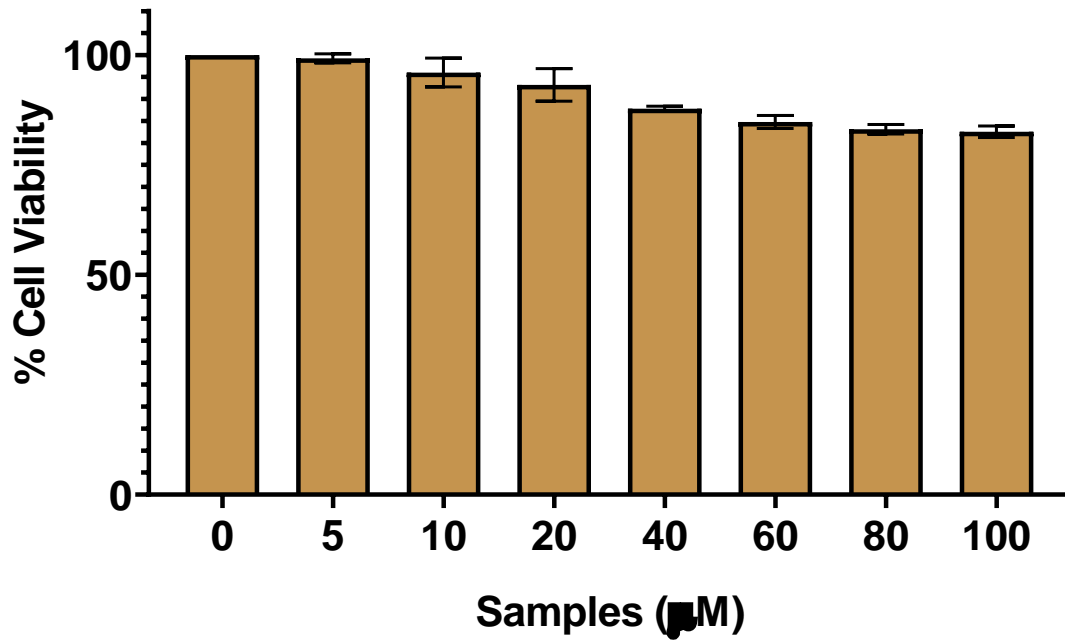

9H

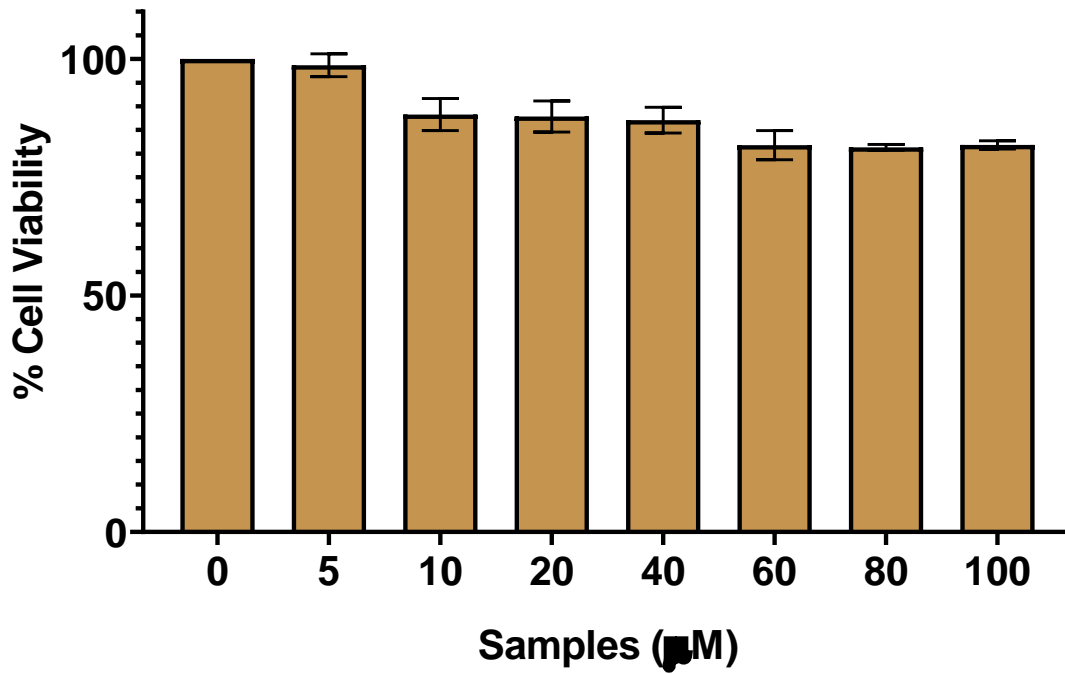



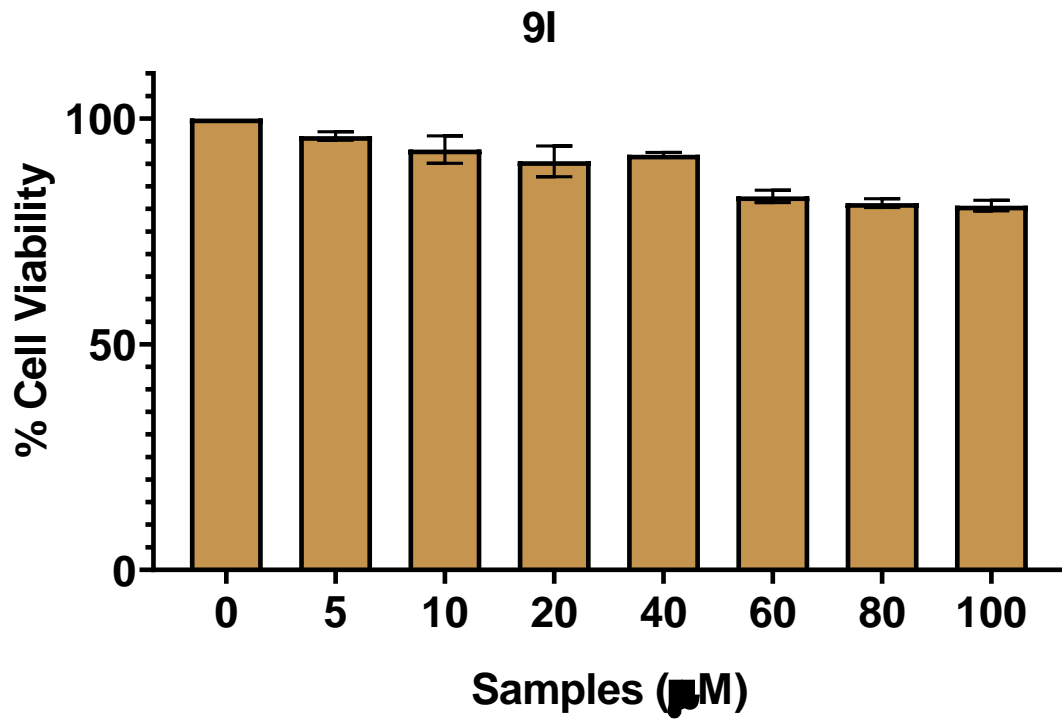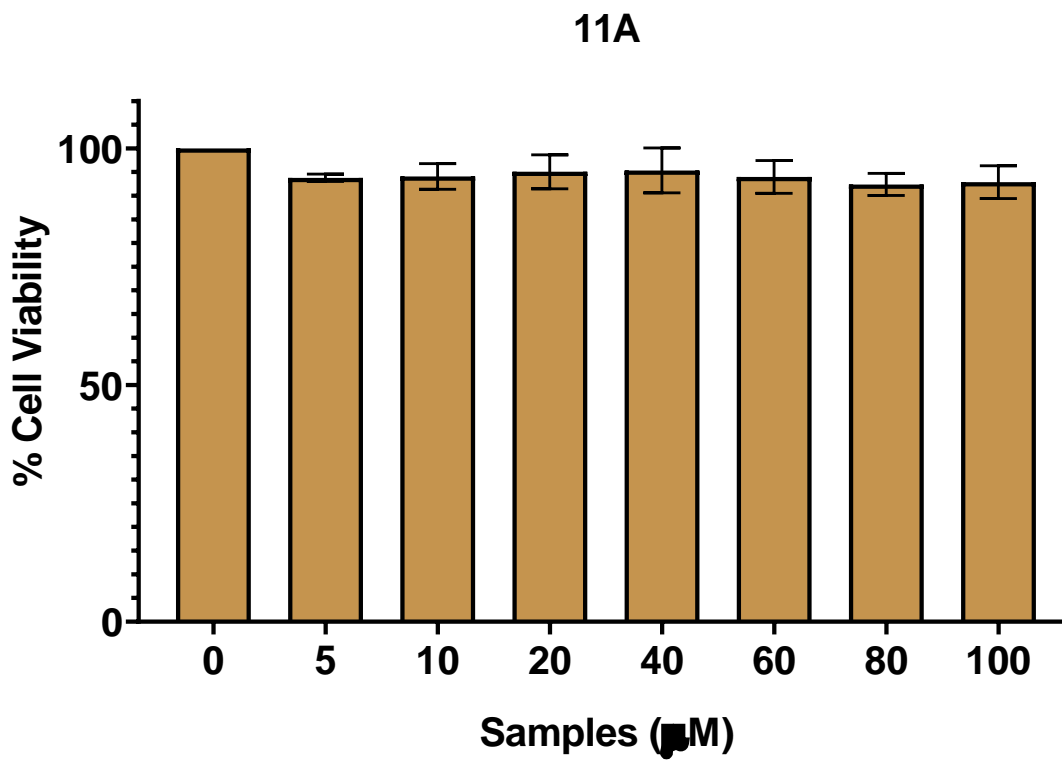

11B

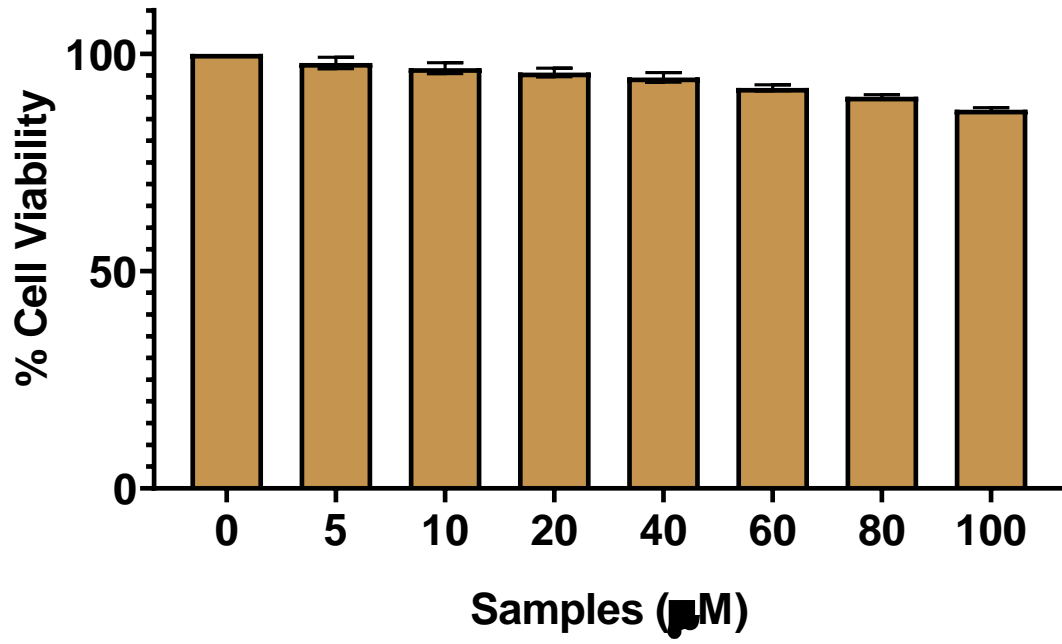

11C

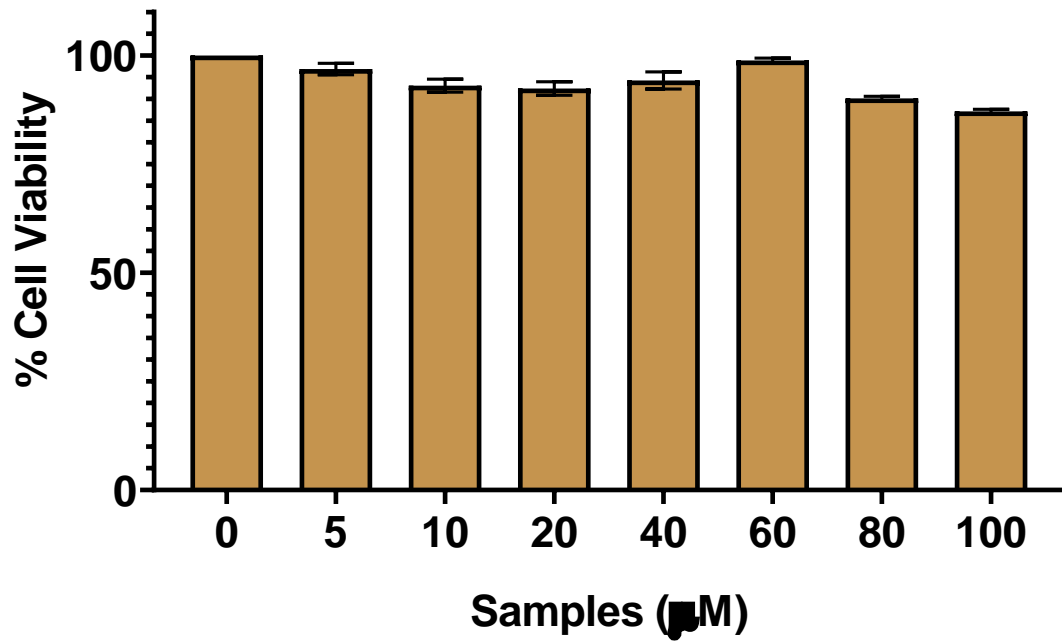

## Acarbose

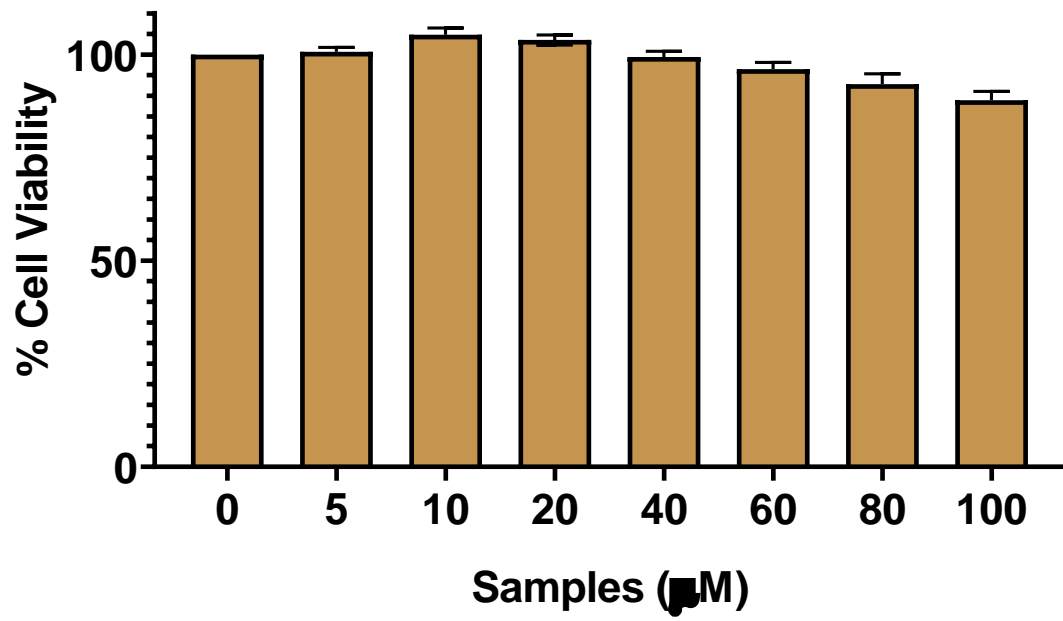

## G. Simulation studies

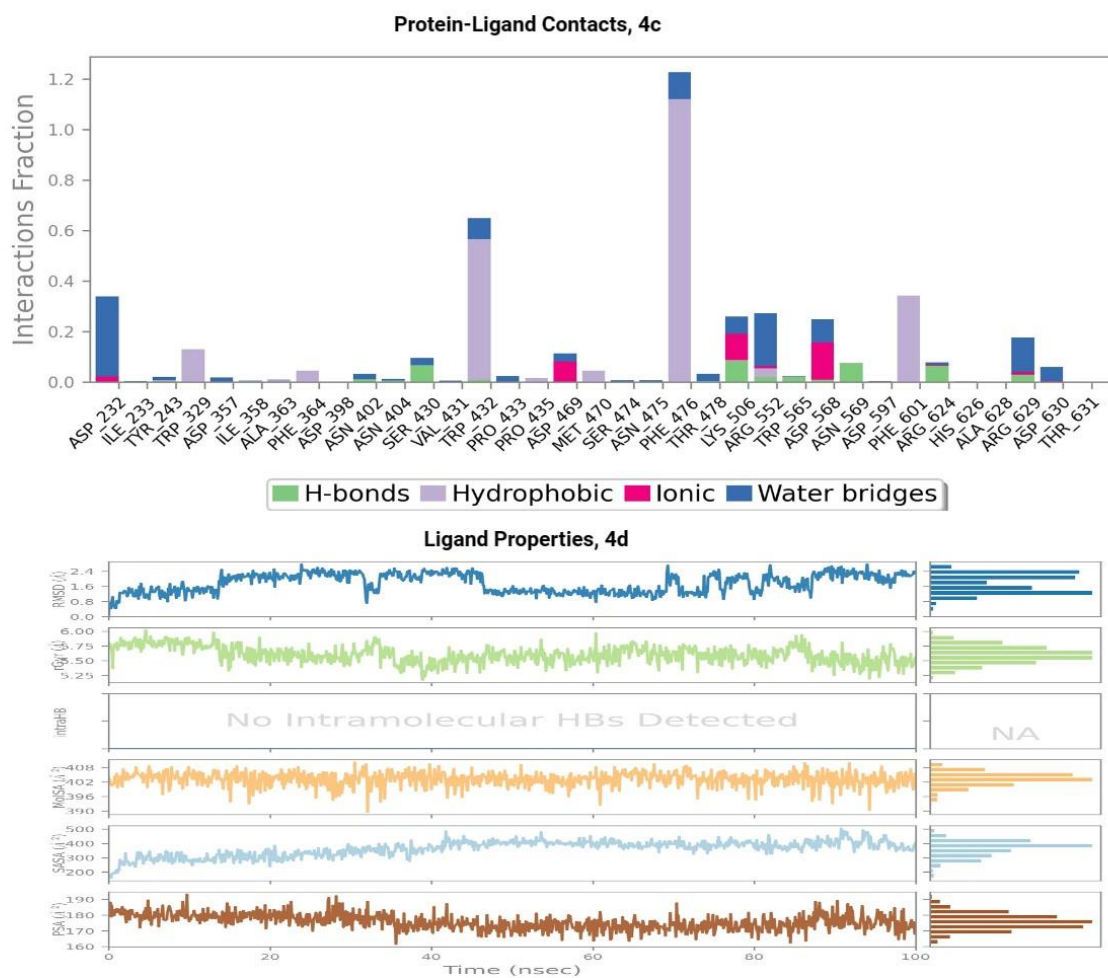

**Figure S2: Simulation of 9G within the active site of alpha-glucosidase (PDB id: 3W37)**

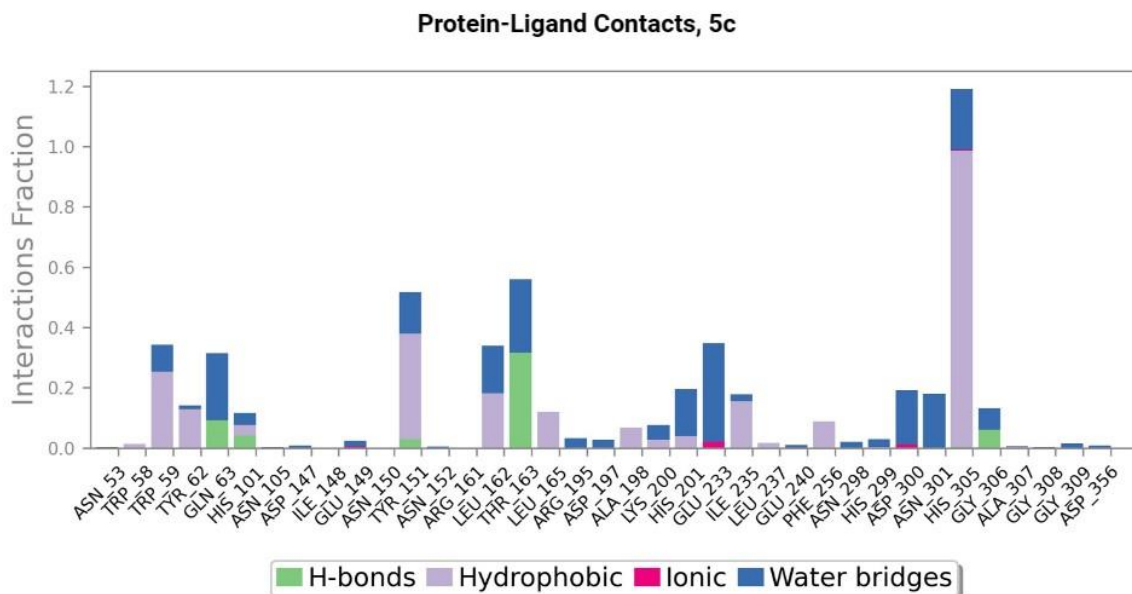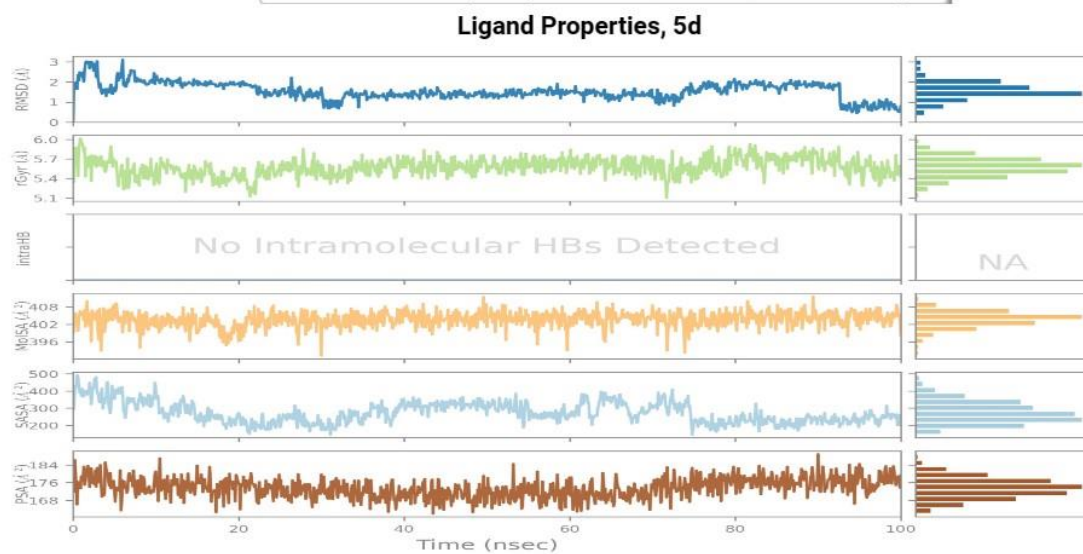

**Figure S3: Simulation of 9G within the active site of alpha-amylase (PDB id: 1B2Y)**

## Ethical Approval

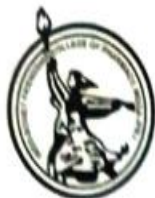

### INSTITUTIONAL ANIMAL ETHICS COMMITTEE

#### ISF COLLEGE OF PHARMACY,

GT Road, Ghal Kalan, MOGA-142001 (Punjab) India

Mob.: 087250-55460, 08146562883, 09779980588 Email: director@isfcp.org

#### Certificate

This is to certify that the project proposal no. 23 entitled "Effect of N-substituted-5-arylidene derivatives of thiazolidinedione in streptozotocin-induced experimental model of diabetes in rats" submitted by Mr. Gurpreet Singh has been approved/recommended by the IAEC of ISF College of Pharmacy, Moga in its meeting held on 26/11/2022 and 42 Wistar Rats have been sanctioned under this proposal for a duration of next 6 months.

| Authorized by           | Name                | Signature | Date       |
|-------------------------|---------------------|-----------|------------|
| Chairman:               | Dr. G.D. Gupta      |           | 26/11/2022 |
| Member Secretary:       | Dr. Shamsheer Singh |           | 26/11/2022 |
| Main Nominee of CPCSEA: | Dr. Rahul Deshmukh  |           | 26.11.22   |

(Kindly make sure that minutes of the meeting duly signed by all the participants are maintained by Office)
